# Supplementary material
Source: publisher figshare collection journal article supplement (https://tandf.figshare.com/articles/dataset/_/5900893)
Supplement: Supplementary file 1 [file 1]

Archive with 2 entries (2 files):
- yidn_a_1437940_sm5080.pdf
- yidn_a_1437940_sm5070.pdf
